# Supplementary material for: Identification of novel glycosylation events on human serum-derived Factor IX
Source: bioRxiv or medRxiv preprint supplement (doi:10.1101/567941), 2020-03-06
Supplement: Supplementary file [file media-1.pdf]

## Identification of novel glycosylation events on human serum-derived Factor IX

<sup>†</sup>School of Chemistry and Molecular Biosciences, The University of Queensland, St Lucia, QLD 4072, Australia.

<sup>‡</sup>Centre for Biopharmaceutical Innovation, Australian Institute for Bioengineering and Nanotechnology, The University of Queensland, St Lucia, QLD 4072, Australia.

Cassandra L. Pegg,<sup>†</sup> Lucia F. Zacchi,<sup>‡</sup> Dinora Roche Recinos<sup>‡</sup> Christopher B. Howard,<sup>‡</sup> and Benjamin L. Schulz<sup>†\*</sup>

\*Corresponding author, Email: [b.schulz@uq.edu.au](mailto:b.schulz@uq.edu.au)

**Fig. S-2a** Annotated spectra of the novel *O*-linked site of human serum Factor IX from Byonic searches. Spectra have been included from the trypsin, chymotrypsin/PNGase and Glu-C digests of the sample.

Trypsin digested sample:

HCD

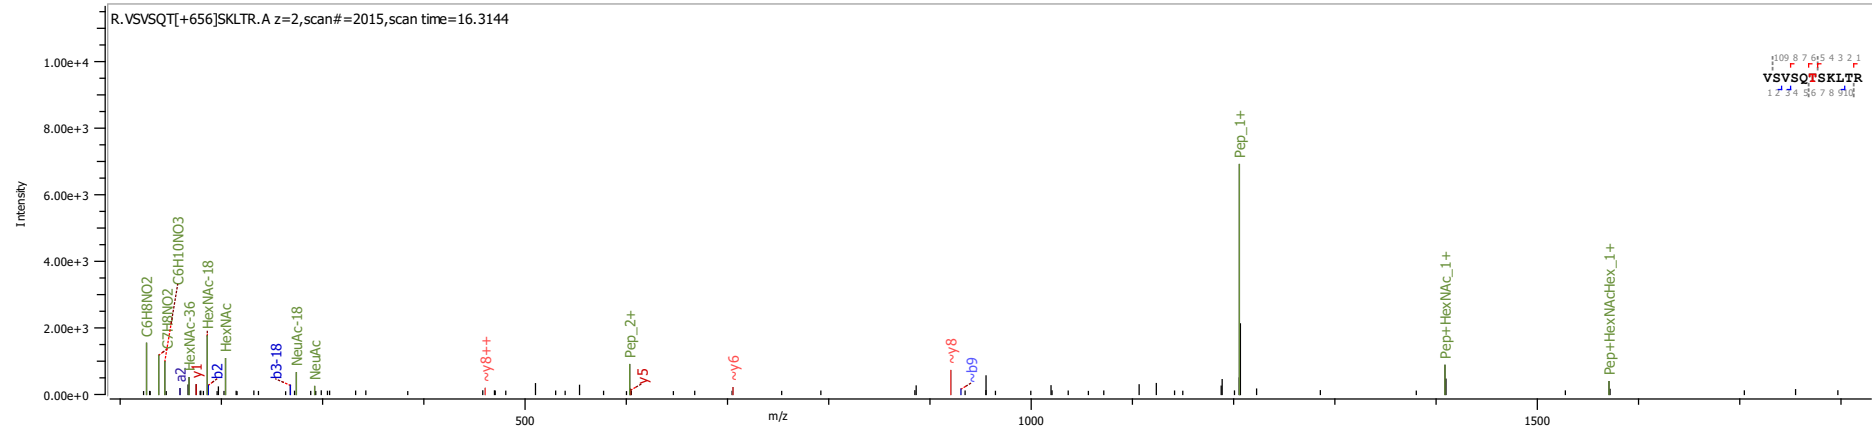

HCD-pd-ETciD

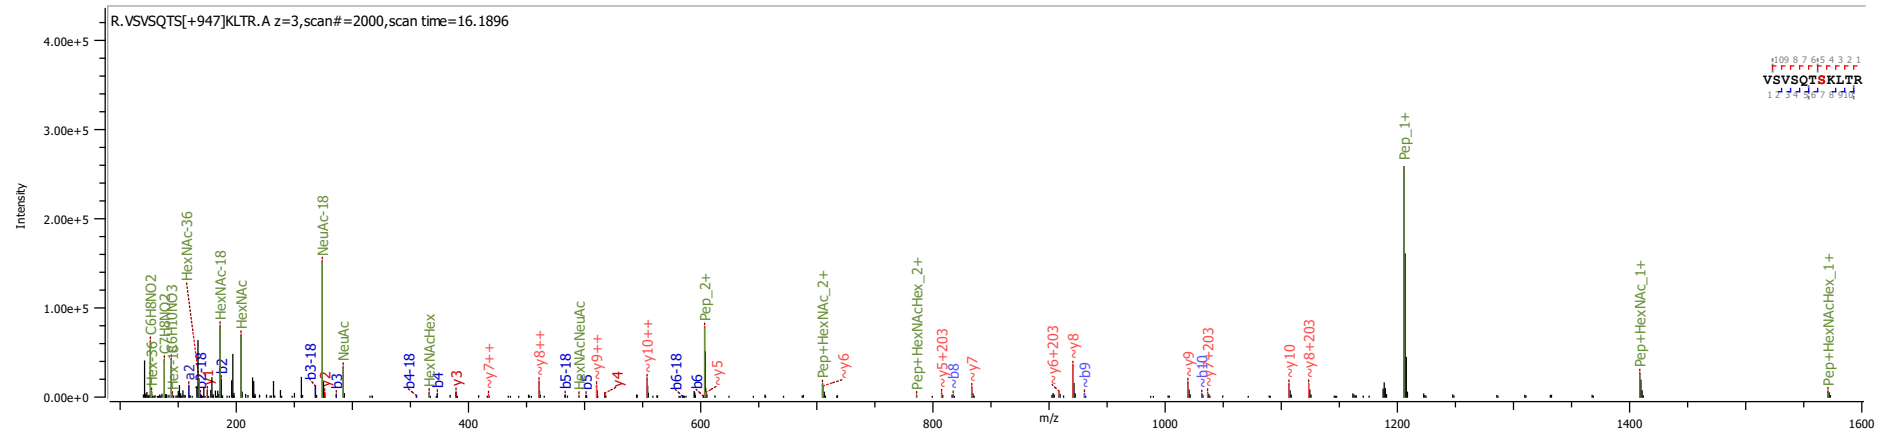

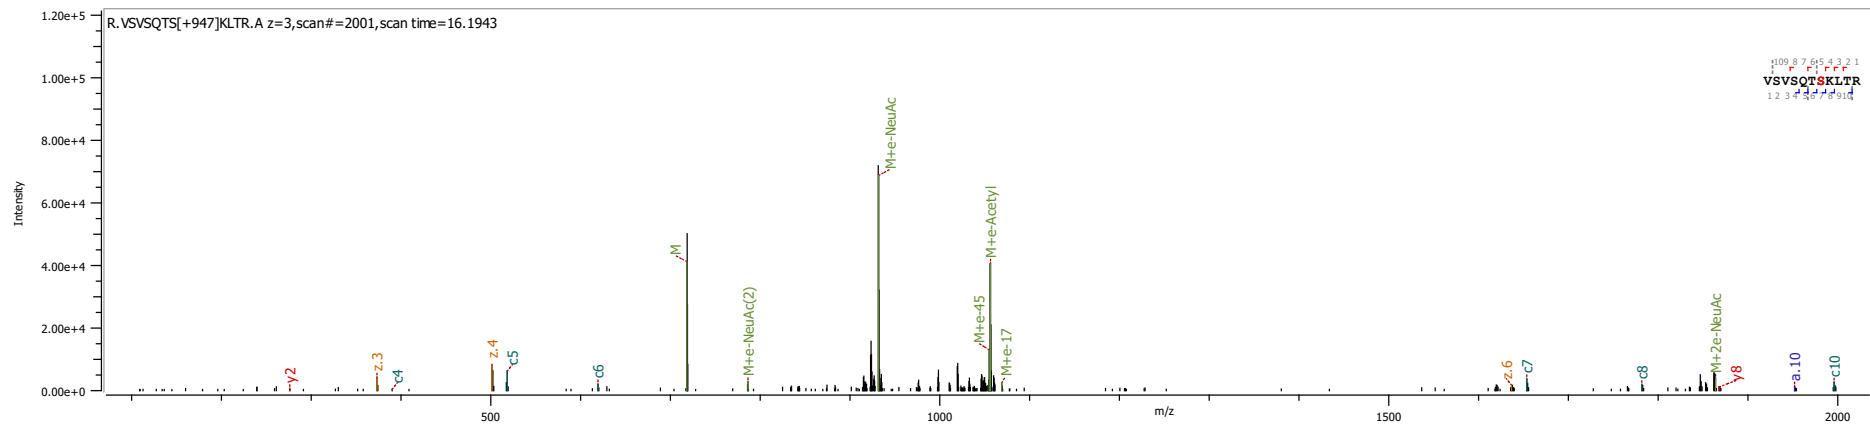

Chymotrypsin/PNGaseF digested sample:

HCD-pd-ETciD

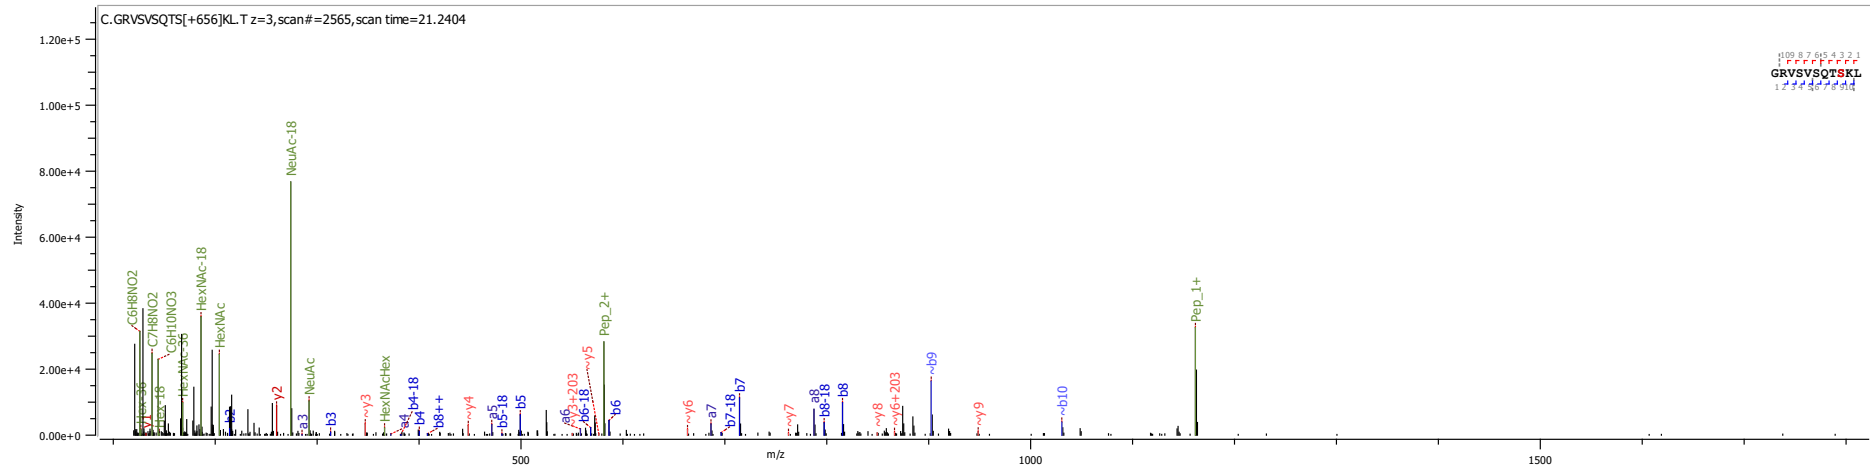

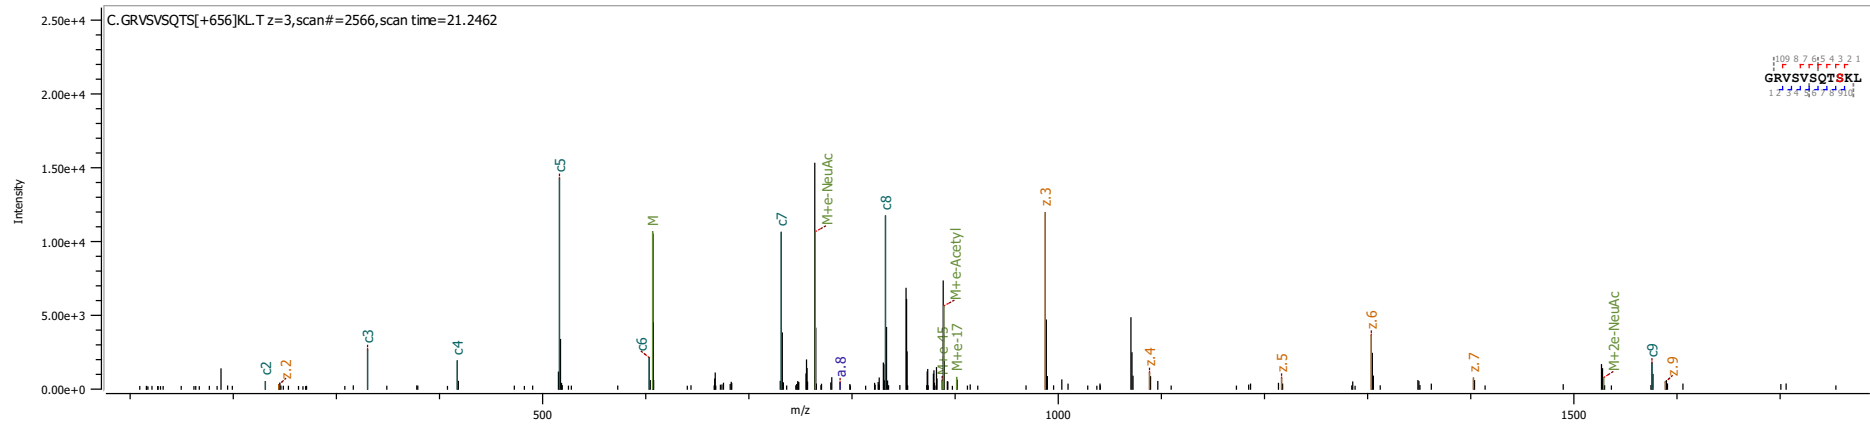

### HCD-pd-ETciD

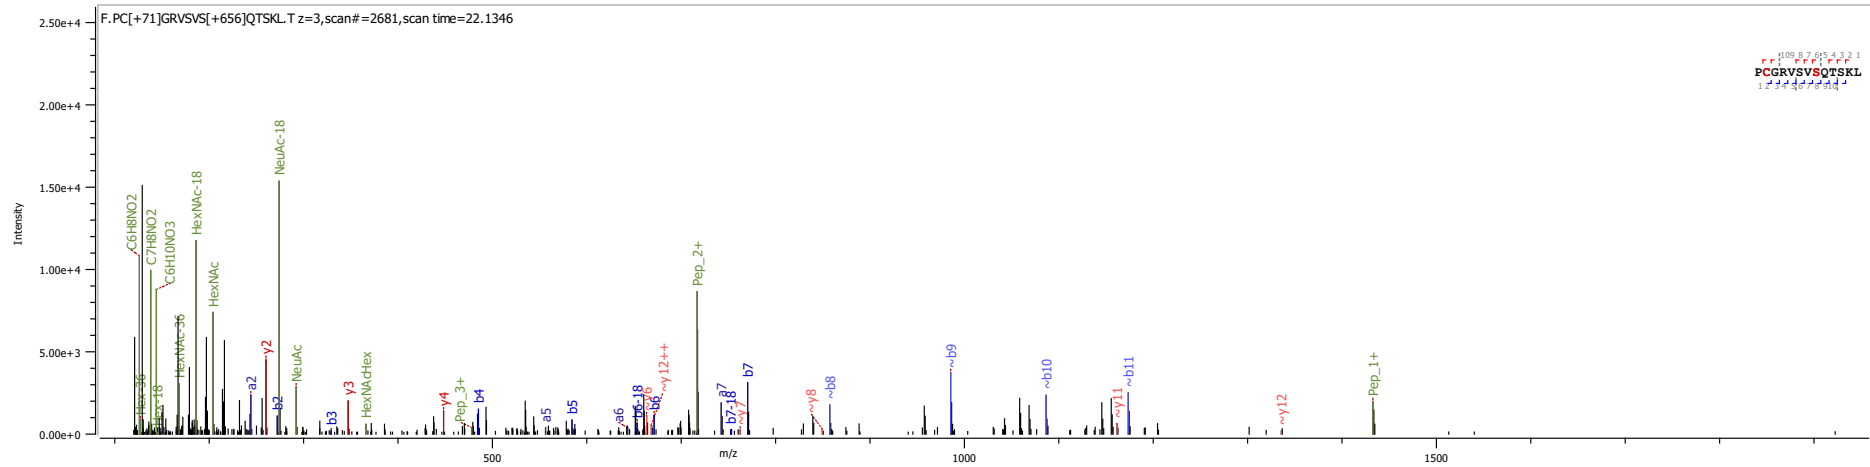

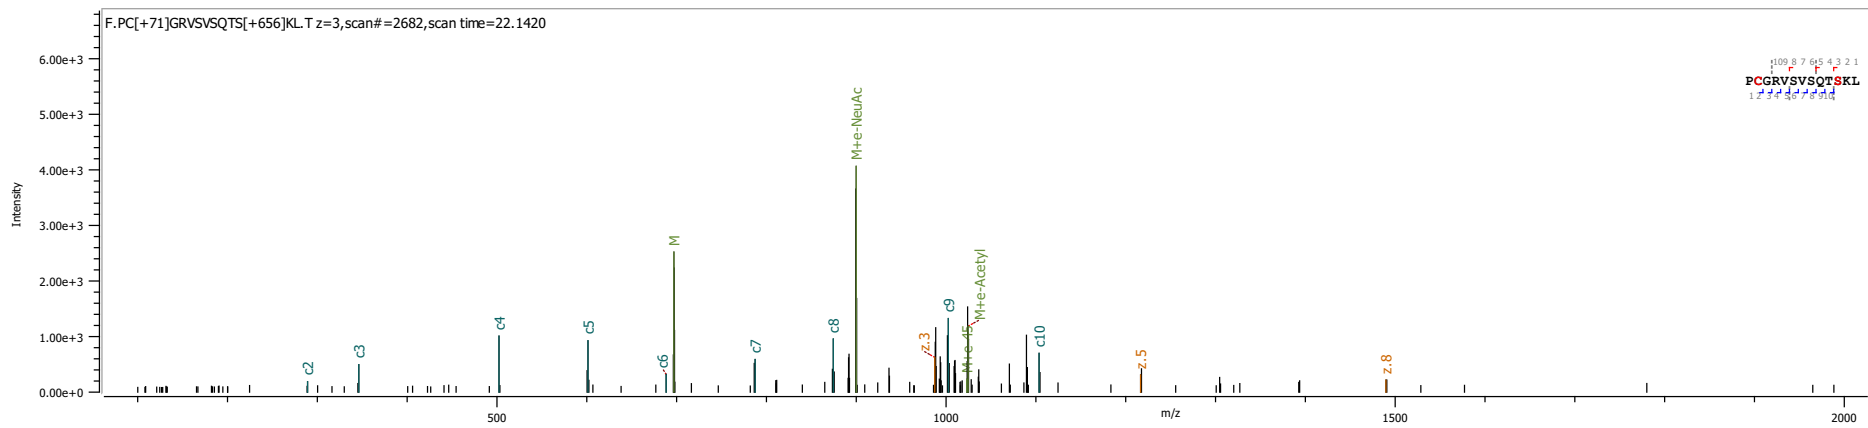

Glu-C digested sample:

HCD

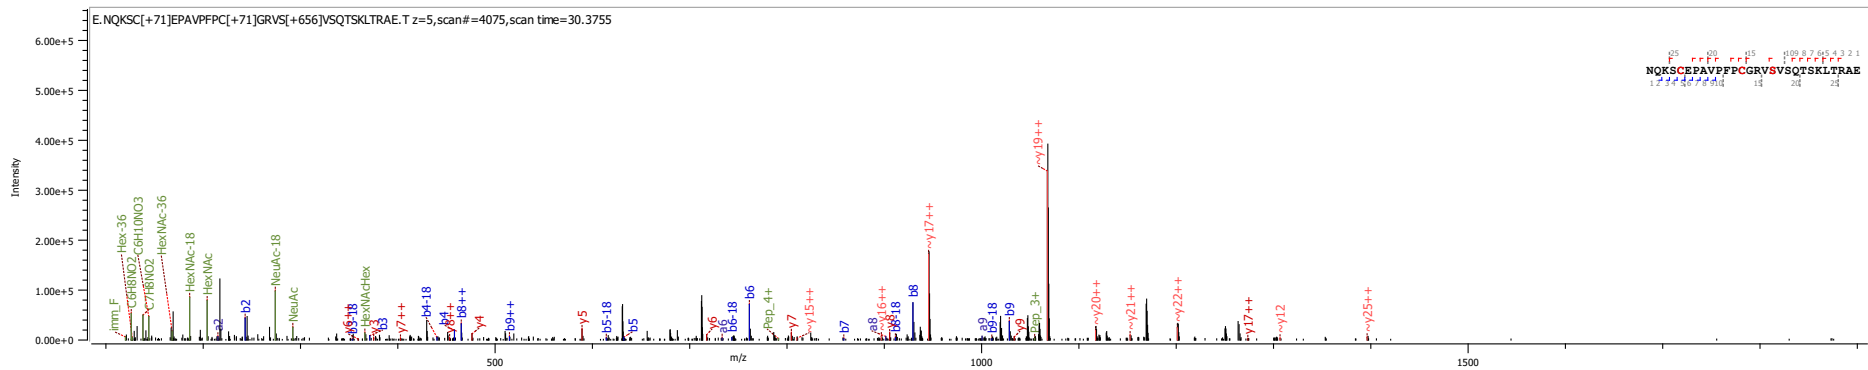

# HCD

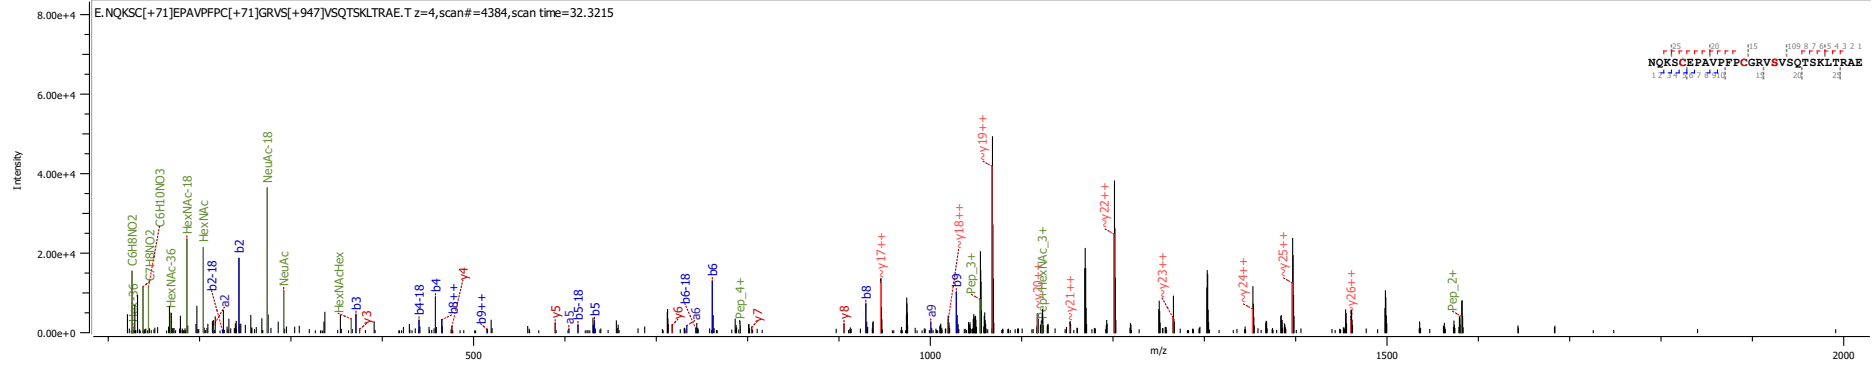

**Fig. S-2b** Annotated spectra of the novel *N*-linked site of human serum Factor IX from Byonic searches. Spectra have been included from the trypsin and Glu-C digests of the sample.

Trypsin digested sample:

HCD

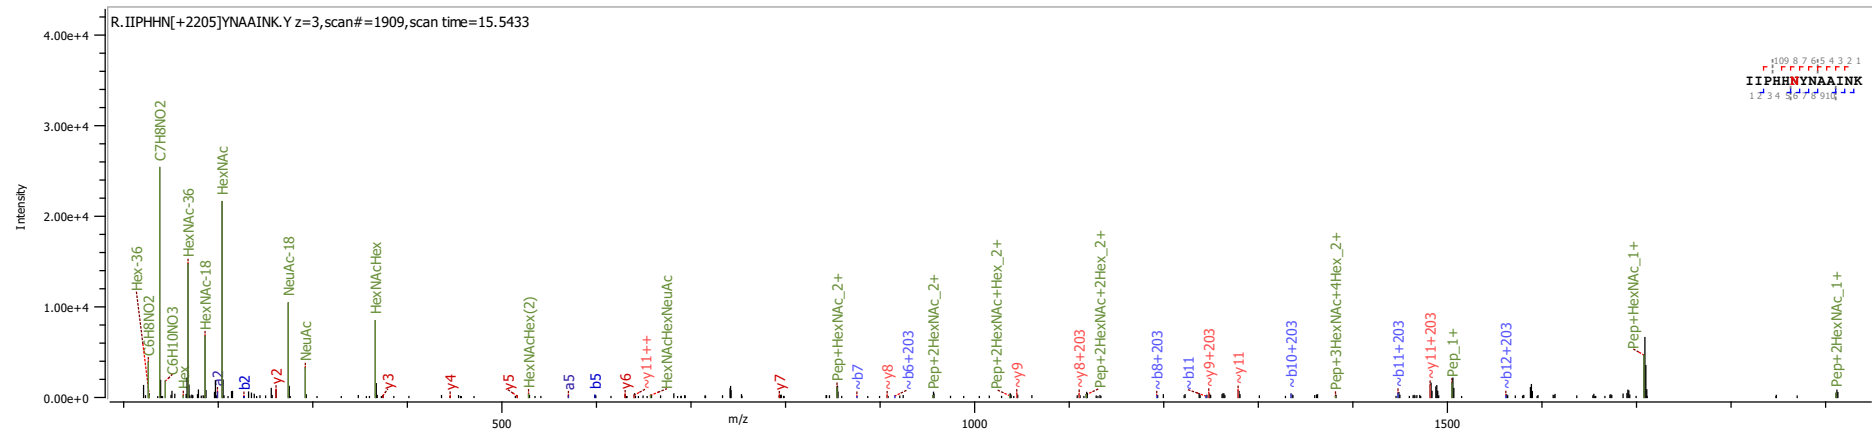

HCD-pd\_ETciD

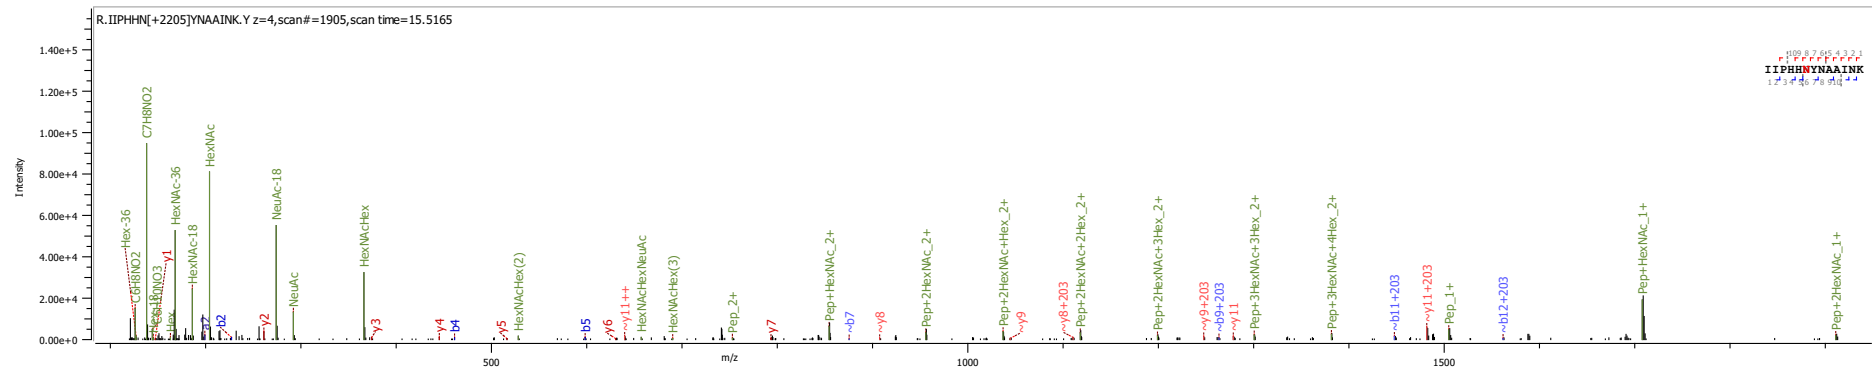

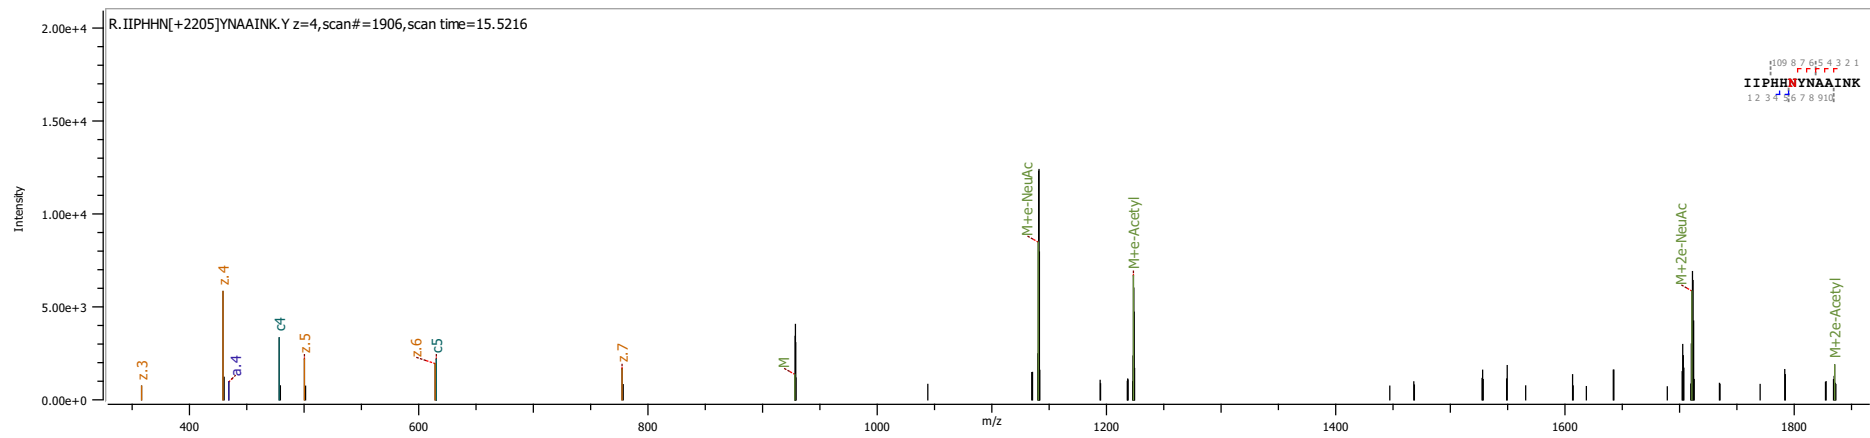

Glu-C digested sample:

HCD

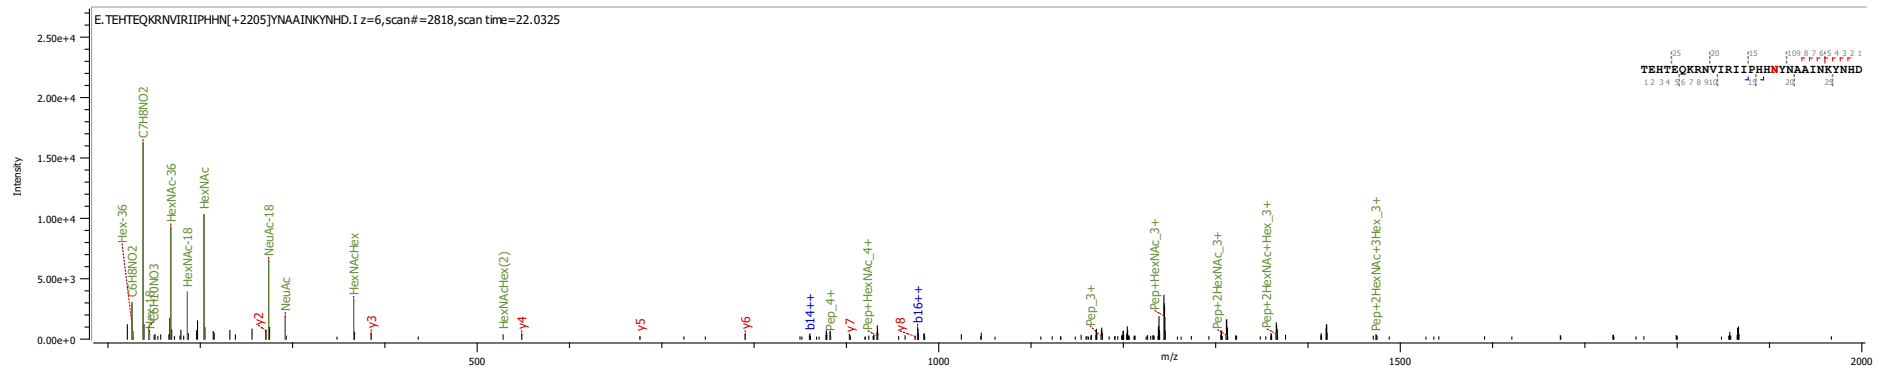



**Fig. S-2c** Annotated spectra of reported post-translational modifications (PTMs) of Factor IX from Byonic searches. Spectra have been listed in the order the PTMs are observed from the N-terminal region of Factor IX.

Reported modification of  $\gamma$ -carboxylation at E40<sup>11-12</sup> from the trypsin digested sample:

### HCD

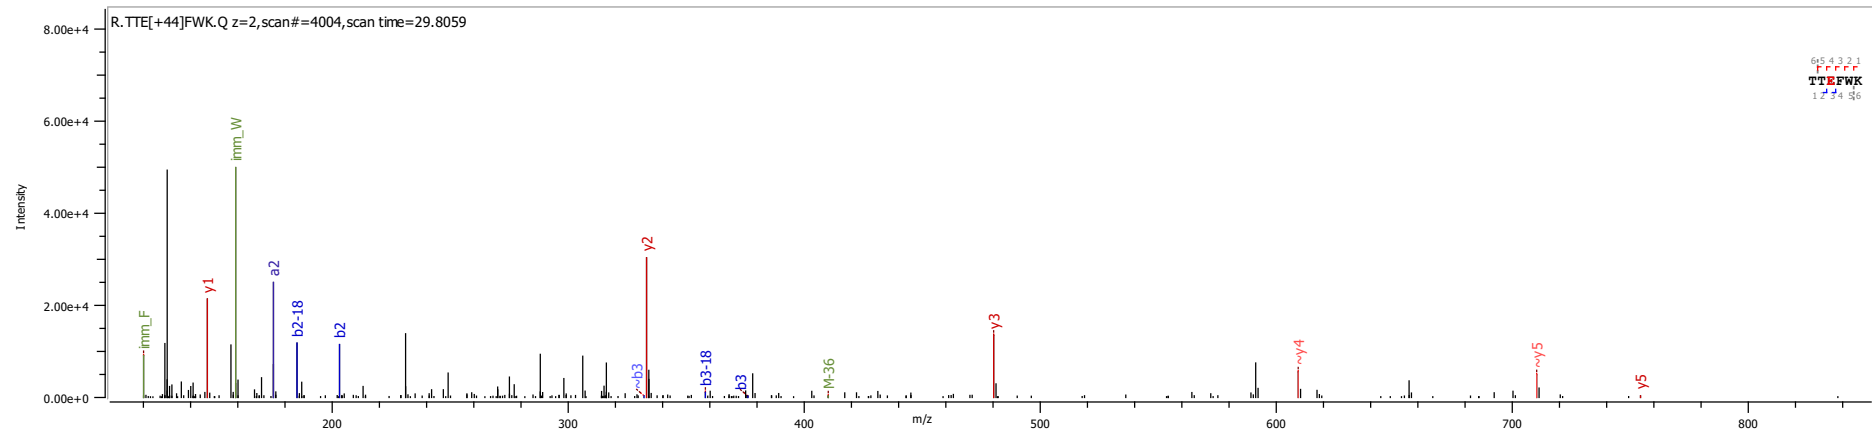

Reported modifications of *O*-linked glucose at Ser53<sup>17</sup>, *O*-linked fucose at Ser6<sup>18-19</sup> and  $\beta$ -hydroxylation of Asp64<sup>15-16</sup> from the Glu-C digested sample. Please note Byonic has assigned the glycans in different positions to those reported in the literature.

### HCD

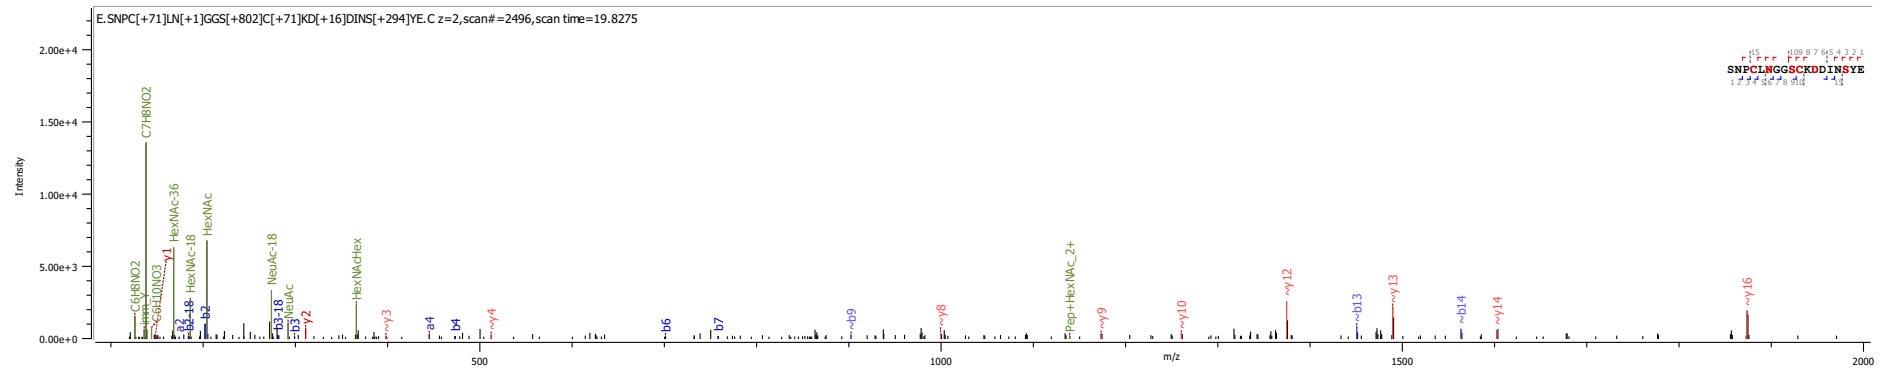

Reported modifications of *O*-linked glucose at Ser53<sup>17</sup> and *O*-linked fucose at Ser6<sup>18-19</sup> from the Glu-C digested sample.

HCD

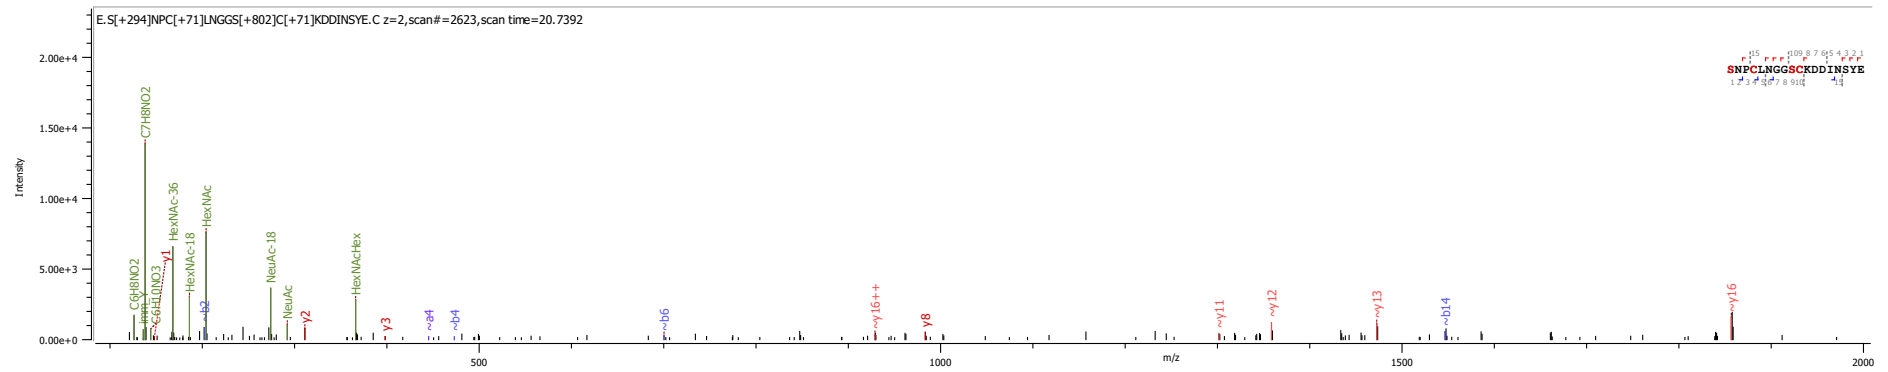

Reported modification of *O*-linked glucose at Ser6<sup>18-19</sup> from the chymotrypsin/PNGaseF digested sample.

HCD

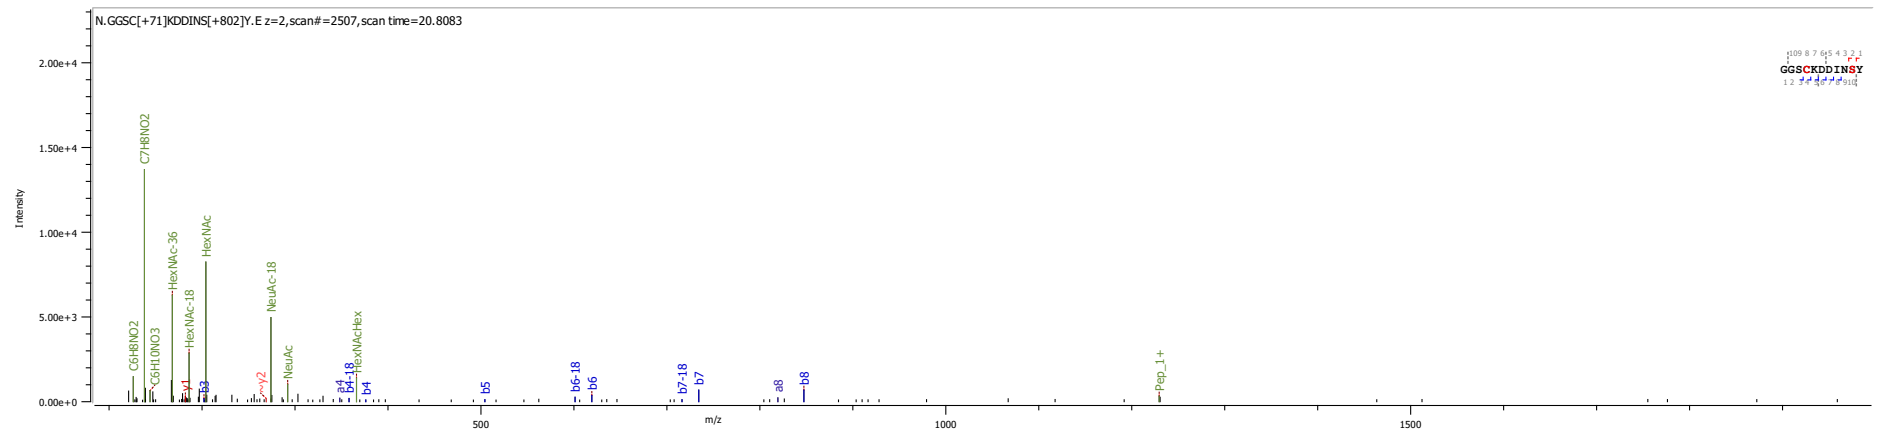

Reported modification of  $\beta$ -hydroxylation of Asp64<sup>15-16</sup> from the trypsin digested sample.

HCD

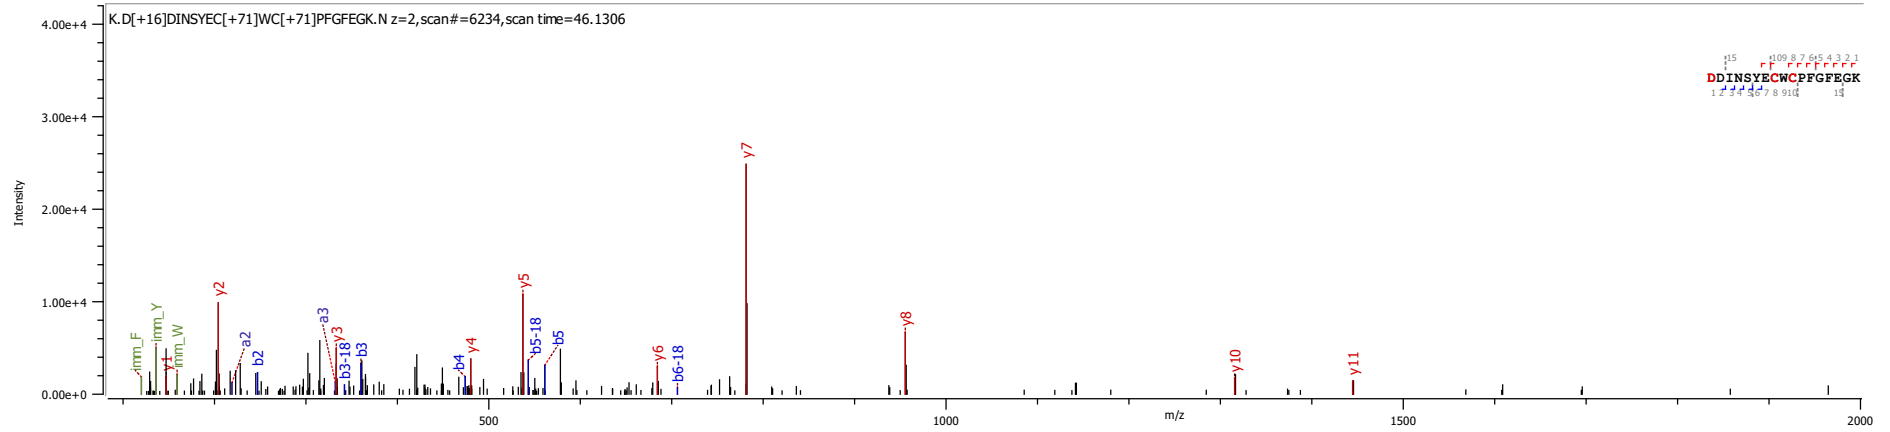

Reported modification of phosphorylation at S68 (Noted in UniProt identifier P00740) from the trypsin digested sample.

HCD

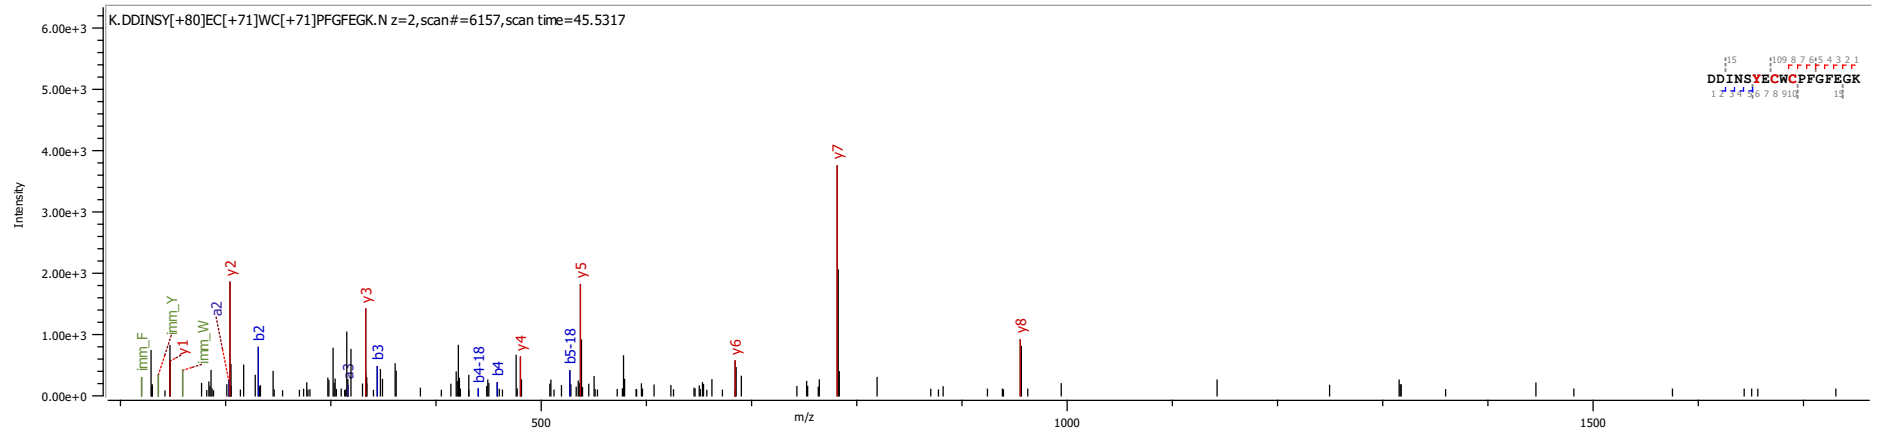

**Fig. S-3** Multiple sequence alignment of human Factor IX, human protein C, human Factor X and human Factor VII and the sequences of Factor IX from *Bos taurus* (bovine), *Pan troglodytes* (chimpanzee), *Mus musculus* (mouse), *Canis lupus familiaris* (dog), *Rattus norvegicus* (rat) and *Sus scrofa* (pig). UniProt accession numbers are listed for each protein and amino acid numbering is based on the full protein sequences.

```

CLUSTAL O(1.2.4) multiple sequence alignment

SP|P00740|FA9_HUMAN  MQRVNMIMAE SPGLITICL-L---GYL-----LSAECTVFLDHENAN  38
SP|P04070|PROC_HUMAN MWQLTS-----LLL FVATWGISGT-----PAPLDSV FSSSERAH  34
SP|P00742|FA10_HUMAN MGRPLH-----LVLLSASL-A---GLL-----L-LGESL FIRREQAN  32
SP|P08709|FA7_HUMAN  -----MVSQ--ALRLLCLLGLQGLAAGGVAKASGGETRDM PWPKPGPHRVFVQGEAH  52
SP|P00741|FA9_BOVIN  MWCLNMIMAE SPGLVTICL-L---GYL-----LSAECTVFLDRENAT  38
SP|Q95ND7|FA9_PANTR  MQRVNMIMAE SPGLITICL-L---GYL-----LSAECTVFLDHENAN  38
SP|P16294|FA9_MOUSE  MKHLNTVMAE SPALITIFL-L---GYL-----LSTECAVFLDRENAT  38
SP|P19540|FA9_CANLF  -----MAEASGLVTVCL-L---GYL-----LSAEC AVFLDRENAT  31
SP|P16296|FA9_RAT    -----MADAPGLIPIFL-L---GYL-----LSTEC AVFLDRENAT  31
SP|P16293|FA9_PIG    -----MADAPGLIPIFL-L---GYL-----LSTEC AVFLDRENAT  31

SP|P00740|FA9_HUMAN  KILNRPKRYNSGKLE-EFVQGNLERECMEEKCSFEEAREVFENTERTTEFWKQYVDGDQC  97
SP|P04070|PROC_HUMAN QVLRIRKRANS--FLEELRHSSLERECIEEICDFE EAKEIFQNVD DTLAFWSKHVDGDQC  92
SP|P00742|FA10_HUMAN NILARVTRANS--FLEEMKKGHLERECMEETCSYEEAREVFEDS DKTNEFWNKYKDGDC  90
SP|P08709|FA7_HUMAN  GVLHRRRRANA--FLEELRPGSLERECKEEQCSFEEAREIFKDAERTKLFWISYSDGDQC  110
SP|P00741|FA9_BOVIN  KILHRPKRYNSGKLE-EFVRGNLERECMEEKCSFEEAREVFENT EKTTEFWKQYVDGDQC  97
SP|Q95ND7|FA9_PANTR  KILNRPKRYNSGKLE-EFVQGNLERECMEEKCSFEEAREVFENT ERTTEFWKQYVDGDQC  97
SP|P16294|FA9_MOUSE  KILTRPKRYNSGKLE-EFVRGNLERECIEERCSFEEAREVFENT EKTTEFWKQYVDGDQC  97
SP|P19540|FA9_CANLF  KILSRPKRYNSGKLE-EFVRGNLERECIEEKC SFEEAREVFENT EKTTEFWKQYVDGDQC  90
SP|P16296|FA9_RAT    KILTRPKRYNSGKLE-EFVQGNLERECIEERCSFEEAREVFENT EKTTEFWKQYVDGDQC  90
SP|P16293|FA9_PIG    -----YNSGKLEESFVRGNLERECIEEKC SFEEAREVFENT EKTNEFWKQYVDGDQC  52
          *:  :  .  .  *****  *  *  .:***:*:*:  :  *  *  .:  *****

SP|P00740|FA9_HUMAN  ESNP-----CLNGGSKDDINSYECWCFPGFEGKNCELD---VTCN IKNGRCEQFC  145
SP|P04070|PROC_HUMAN LVLPLEHPCASLCCGHGTCIDGIGSFSCDCRS GWEGRFQCQRE-VSFLNCSLDNGGCTHYC  151
SP|P00742|FA10_HUMAN ETSP-----CQNGGCKDGLGEYTCCTLEGFEGKNCELF--TRK LCLSLDNGDCDQFC  140
SP|P08709|FA7_HUMAN  ASSP-----CQNGGSKDQLQSYICFCLPAFEGRNCE THKDDQLICVNENGGCEQYC  162
SP|P00741|FA9_BOVIN  ESNP-----CLNGGMCKDDINSYECWCQAGFEGTNCELD---ATCS IKNGRCKQFC  145
SP|Q95ND7|FA9_PANTR  ESNP-----CLNGGSKDDINSYECWCFPGFEGKNCELD---VTCN IKNGRCEQFC  145
SP|P16294|FA9_MOUSE  ESNP-----CLNGGICKDDISSYECWCQVGFEGRNCELD---ATCNIKNGRCKQFC  145
SP|P19540|FA9_CANLF  ESNP-----CLNDGVCKDDINSYECWCRA GFEGKNCELD---VTCN IKNGRCKQFC  138
SP|P16296|FA9_RAT    ESNP-----CLNGGICKDDINSYECWCQAGFEGRNCELD---ATCS IKNGRCKQFC  138
SP|P16293|FA9_PIG    EPNP-----CLNGGLCKDDINSYECWCQVGFEGKNCELD---ATCNIKNGRCKQFC  100
          *          *  .  *  *  *  :  .:  *  *  .:***  *:          *  .***  *  ::*

SP|P00740|FA9_HUMAN  KNSADNKVVC SCTEGYRLAENQKSCEPAVFPFCGRVSVS QTS-KLTRAETVFPD----VD  200
SP|P04070|PROC_HUMAN LEEVG-WRRCSCAPGYKLGDDLLQCHPAVKFPCGRP WKRMEKKRSHLK-----  198
SP|P00742|FA10_HUMAN HEE-QNSVVCSCARGYTLADNGKACIPTGYPYPCGQ TLERRKRVAQATSSSGEAPDSIT  199
SP|P08709|FA7_HUMAN  SDHTGTRKSCRCHEGYSLADGVSCTPTVEYPCGKIPILEKRN-----  205
SP|P00741|FA9_BOVIN  KRDTDNKVVCSCTDGYRLAEDQKSCEPAVFPFCGRVSVSHI SKKLTRAETIFSN----TN  201
SP|Q95ND7|FA9_PANTR  KNSADNKVVC SCTEGYRLAENQKSCEPAVFPFCGRVSVS QTS-KLTRAETVFPD----VD  200
SP|P16294|FA9_MOUSE  KNSPDNKVIC SCTEGYQLAEDQKSCEPTVFPFCGRASISYSSKKITRAETVFSN----MD  201
SP|P19540|FA9_CANLF  KLGPDNKVVCSCTTG YQLAEDQRSCEPAVFPFCGRVSVPHI SMTRTRAETLFSN----MD  194
SP|P16296|FA9_RAT    KNSPDNKIIC SCTEGYQLAEDQKSCEPAVFPFCGRVSVAYNSKKITRAETVFSN----TD  194
SP|P16293|FA9_PIG    KTGADSKVLC SCTTG YRLAPDQKSCKPAVFPFCGRVSVSHSPTTLTRAEIIFSN----MD  156
          *  *  *  *  *  :  *  *  :***:

SP|P00740|FA9_HUMAN  YVNSTEAE T-----ILDNITQSTQSFNDFTRVVGGEDAKPGQFPWQVVL-NGKVDA  250
SP|P04070|PROC_HUMAN -----RDTEDEQVDPRLDIGKMTRRGDS PWQVLLDSKKKL  236
SP|P00742|FA10_HUMAN WKPYDAADLDPTENPFDLLDFNQTPERGDNNLTRIVGGQ ECKDGECPWQALLINEENEG  259
SP|P08709|FA7_HUMAN  -----ASKPQGRIVGGKVC PKGECPWQVLLL-VNQAQ  236
SP|P00741|FA9_BOVIN  YENSSEAEI-----IWDNVTSQNSQSFDFCSR VVGGEDAERGQFPWQVLL-HGEIAA  251
SP|Q95ND7|FA9_PANTR  YVNSTEAE T-----ILDNITQSTQSFNDFTRVVGGEDAKPGQFPWQVVL-NGKVDA  250
SP|P16294|FA9_MOUSE  YENSTEAVFIQDDITDGA LLNNVTESSESLNDFTRVVGGENAKPGQIPWQVIL-NGEIEA  260
SP|P19540|FA9_CANLF  YENSTEVEK-----ILDNV TQ---PLNDFTRVVG GKDAKPGQFPWQVLL-NGKVDA  241
SP|P16296|FA9_RAT    YGNSTEL--ILDDITNSTILDNLTENSEPINDFTRVVGGENAKPGQIPWQVIL-NGEIEA  251
SP|P16293|FA9_PIG    YENSTEVEP-----ILDSL TESNQSSDDFIRIVGGENAKPGQFPWQVLL-NGKIDA  206
          .  *::*:  *  :***:*  :

SP|P00740|FA9_HUMAN  FCGGSIVNEKWI VTAACHVETGVK---ITVVAGEHNI EETEHTEQKRNVIRIIPHNNYNA  307
SP|P04070|PROC_HUMAN ACGAVLIHPSWV LTAACHMDESCK---LLVRLGEYDLRRWEK WELDLDIKEVFVHPNYS-  292
SP|P00742|FA10_HUMAN FCGGTILSEFYI LTAACHLYQAKR---FKVRVGRNTEQE EGGEAVHEVEVVIKHNRF-  315

```

SP|P08709|FA7\_HUMAN LCGGTLINTIWWVSAAHCFDKIKNWRNLI AVLGEHDLSEHDGDEQSRRAQVVIIPSTYV- 295  
 SP|P00741|FA9\_BOVIN FCGGSIVNEKWVVTAAHCLKPGVK---ITVVAGEHNTEKPEPEQKRNVRIRAIPIPHSYNA 308  
 SP|Q95ND7|FA9\_PANTR FCGGSIVNEKWIVTAAHCVDTGVK---ITVVAGEHNIEETEHEQKRNVRIRIIPHHNYNA 307  
 SP|P16294|FA9\_MOUSE FCGGAIINEKWIVTAAHCLKPGDK---IEVVAGEYNI DKKEDTEQRRNVIRTIPHHQYNA 317  
 SP|P19540|FA9\_CANLF FCGGSIINEKWVVTAAHCLIEPDVK---ITIVAGEHNTEKREHTEQKRNVRITILHHSYNA 298  
 SP|P16296|FA9\_RAT FCGGAIINEKWIVTAAHCLKPGDK---IEVVAGEHNIDEKEDTEQRRNVIRTIPHHQYNA 308  
 SP|P16293|FA9\_PIG FCGGSIIINEKWVVTAAHCLIEPGVK---ITVVAGEYNTETEPEQKRNVRIRAIPIPHSYNA 263  
 \*. . : : : : \* \* \* \* . . : : \* : : . : \* : : :

SP|P00740|FA9\_HUMAN AINKYNHDIALLELDEPLVLSYVTPIC IADKEYTNI-FLKFG-SGYVSGWGRVFNHGR- 364  
 SP|P04070|PROC\_HUMAN -KSTTDNDIALLLHLAQPATLSQTIVPICLPDSGLAERELNQAQGETLVTGWGYHSSREKE 351  
 SP|P00742|FA10\_HUMAN -KETYDFDI AVLRLKTPITFRMNVA PACLP ERDWAESTLMTQK-TGIVSGFGRTHEKGR- 372  
 SP|P08709|FA7\_HUMAN -PGTTNHDIALLRHQPVVLT DHVVPLCLPERTF SERTLAFVR-FSLVSGWGQLDRGA- 352  
 SP|P00741|FA9\_BOVIN SINKYSHDIALLELDEPLELNSYVTPIC IADRDTYNI-FLKFG-YGYVSGWGWKVFNRGR- 365  
 SP|Q95ND7|FA9\_PANTR AINKYNHDIALLELDEPLVLSYVTPIC IADKEYTNI-FLKFG-SGYVSGWGRVFNHGR- 364  
 SP|P16294|FA9\_MOUSE TINKYSHDIALLELDKPLIILNSYVTPIC VANREY TNI-FLKFG-SGYVSGWGWKVFNRGR- 374  
 SP|P19540|FA9\_CANLF TINKYNHDIALLELDEPLTLNSYVTPIC IADREYSNI-FLKFG-SGYVSGWGRVFNHGR- 355  
 SP|P16296|FA9\_RAT TINKYSHDIALLELDKPLIILNSYVTPIC VANKEY TNI-FLKFG-SGYVSGWGWKVFNRGR- 365  
 SP|P16293|FA9\_PIG TVNKYSHDIALLELDEPLTLNSYVTPIC IADKEYTNI-FLKFG-SGYVSGWGRVFNHGR- 320  
 . . \* \* \* : \* \* \* : : . \* \* : : : : \* : : \* : :

SP|P00740|FA9\_HUMAN ----SALVLQYLRVPLVDRATCLRST----KFTIYNNMFCAGFHEGGKSDCQGDSSGGPH 415  
 SP|P04070|PROC\_HUMAN AKRNRTFVLFNFIKIPVVP HNECSEVM----SNMVS ENMLCAGILGDRQDACEGDSGGPM 406  
 SP|P00742|FA10\_HUMAN ----QSTR LKMLEVPYVDRNSCKLSS----SFIITQNMFCAGYDTKQEDACQGDSSGGPH 423  
 SP|P08709|FA7\_HUMAN ----TALELMVLNVPR LMTQDCLQSRKVG DSNITEYMF CAGYSDGSKDSCCKGDSGGPH 408  
 SP|P00741|FA9\_BOVIN ----SASILQY LKVPVLD RATCLRST----KFSIYSHMFCAGYHEGGKSDCQGDSSGGPH 416  
 SP|Q95ND7|FA9\_PANTR ----SALVLQYLRVPLVDRATCLRST----KFTIYNNMFCAGFHEGGKSDCQGDSSGGPH 415  
 SP|P16294|FA9\_MOUSE ----QASILQYLRVPLVDRATCLRST----TFTIYNNMFCAGYREGGKSDCEGDSGGPH 425  
 SP|P19540|FA9\_CANLF ----SASILQY LKVPVLD RATCLRST----KFTIYNNMFCAGFHEGGKSDCQGDSSGGPH 406  
 SP|P16296|FA9\_RAT ----QASILQYLRVPLVDRATCLRST----KFSIYNNMFCAGYREGGKSDCEGDSGGPH 416  
 SP|P16293|FA9\_PIG ----SATILQY LKVPVLD RATCLRST----KVTIYSNMFCAGFHEGGKSDCLGDSGGPH 371  
 : \* : : \* : \* : . : . \* : \* \* \* . \* : \* \* \* \* \*

SP|P00740|FA9\_HUMAN VTEVEGTSFLTGIISWGEECAMKGYGIYTKVSRVYVNWIK ETKTCLT----- 461  
 SP|P04070|PROC\_HUMAN VASFHGTWFLVGLVSWGEGCGLLHNYGVYTKVSRYLDWIHGHIRDKEAPQKSW-AP---- 461  
 SP|P00742|FA10\_HUMAN VTRFKDTYFVTGIVSWGEGCARKGKYGIYTKVTAFLKWI DRSMKTRGLPKAKSHAPEVIT 483  
 SP|P08709|FA7\_HUMAN ATHYRG TWYLTGIVSWGQCATVGHFGVYTRVSQYIEWLQKLMRSEPRPGVLLRAPFP-- 466  
 SP|P00741|FA9\_BOVIN VTEVEGTSFLTGIISWGEECAMKGYGIYTKVSRVYVNWIK ETKTCLT----- 462  
 SP|Q95ND7|FA9\_PANTR VTEVEGTSFLTGIISWGEECAMKGYGIYTKVSRVYVNWIK ETKTCLT----- 461  
 SP|P16294|FA9\_MOUSE VTEVEGTSFLTGIISWGEECAMKGYGIYTKVSRVYVNWIK ETKTCLT----- 471  
 SP|P19540|FA9\_CANLF VTEVEGISFLTGIISWGEECAMKGYGIYTKVSRVYVNWIK ETKTCLT----- 452  
 SP|P16296|FA9\_RAT VTEVEGTSFLTGIISWGEECAMKGYGIYTKVSRVYVNWIK ETKTCLT----- 462  
 SP|P16293|FA9\_PIG VTEVEGTSFLTGIISWGEECAVKGKYGIYTKVSRVYVNW----- 409  
 . : . . : : \* : \* \* \* : \* . : : \* \* \* : : : \*

SP|P00740|FA9\_HUMAN -----  
 SP|P04070|PROC\_HUMAN -----  
 SP|P00742|FA10\_HUMAN SSPLK 488  
 SP|P08709|FA7\_HUMAN -----  
 SP|P00741|FA9\_BOVIN -----  
 SP|Q95ND7|FA9\_PANTR -----  
 SP|P16294|FA9\_MOUSE -----  
 SP|P19540|FA9\_CANLF -----  
 SP|P16296|FA9\_RAT -----  
 SP|P16293|FA9\_PIG -----
